# Supplementary material for: Modulation of pulmonary IL-21 expression during latent TB and M. tuberculosis/SIV coinfection
Source: JCI journal article supplement (doi:10.1172/jci.insight.199217), 2026-05-05
Supplement: sd1 [file 1]

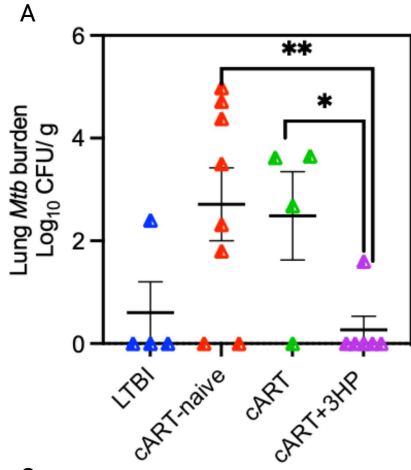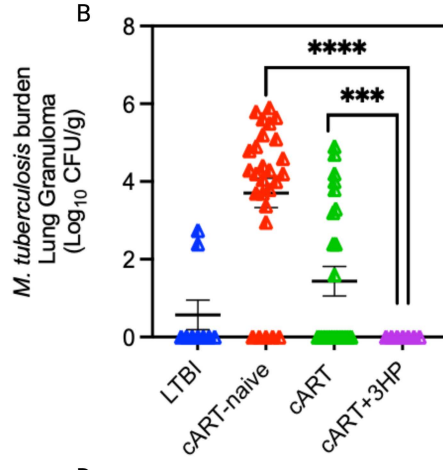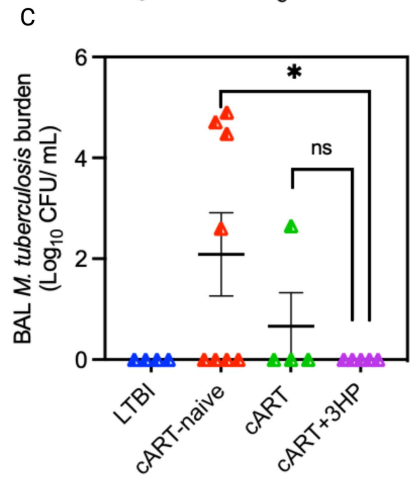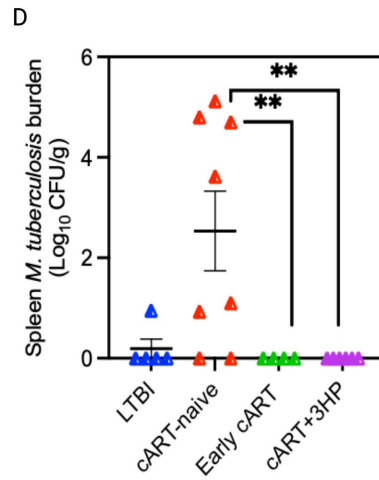

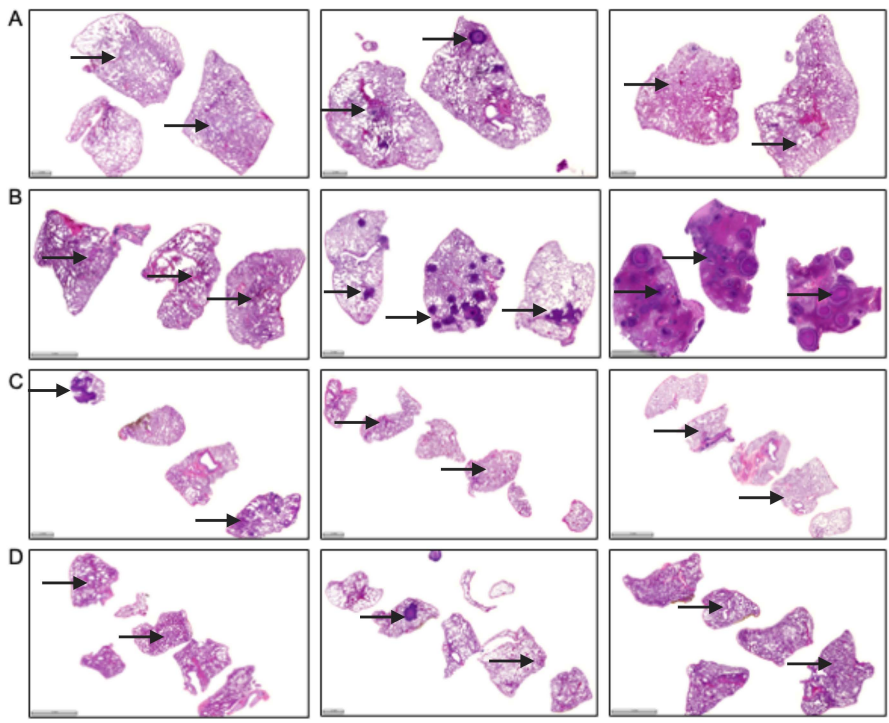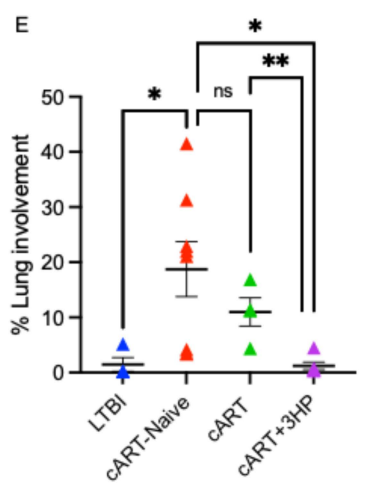

GP50

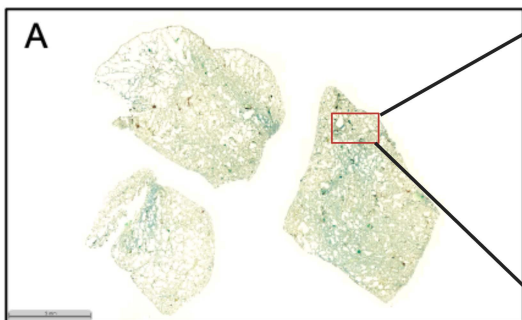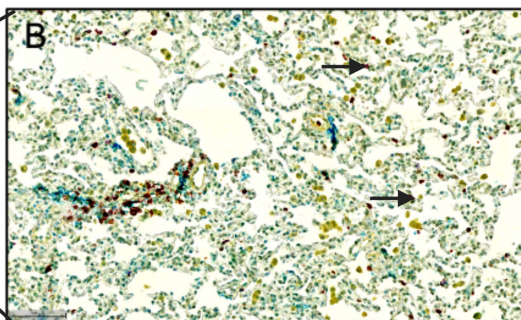

HV02

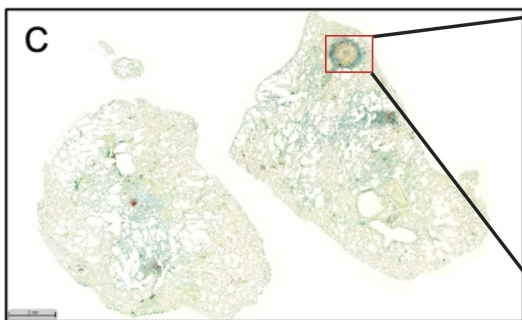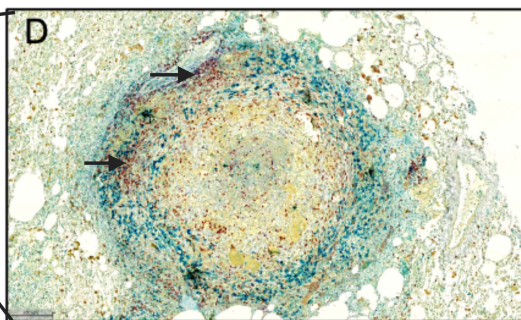

JF47

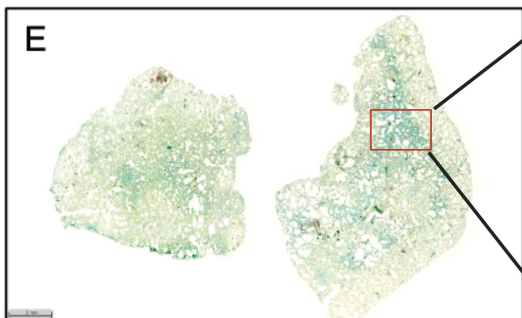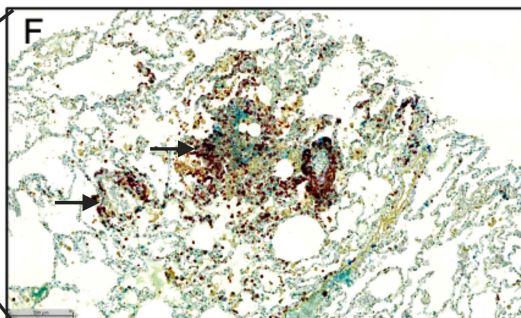

JH07

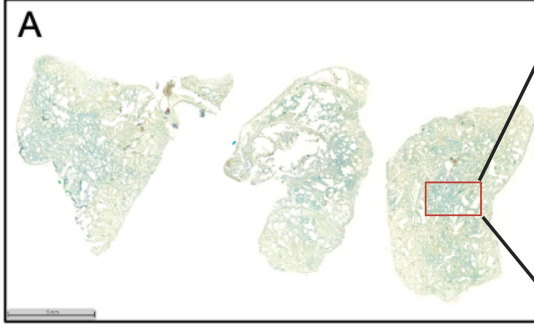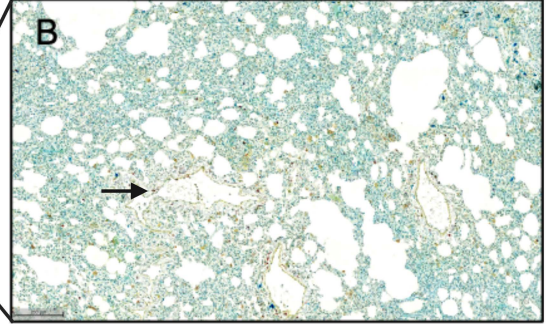

KG40

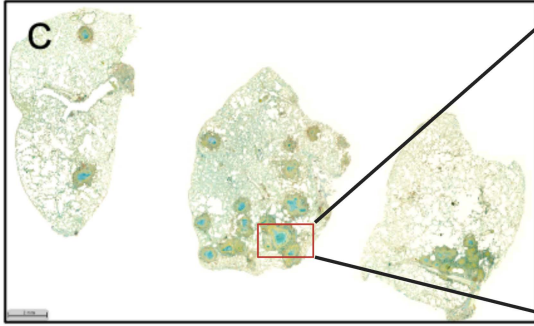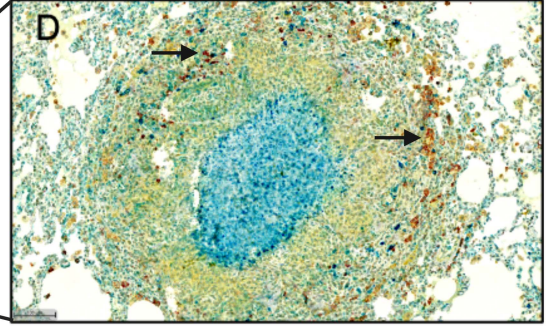

KR44

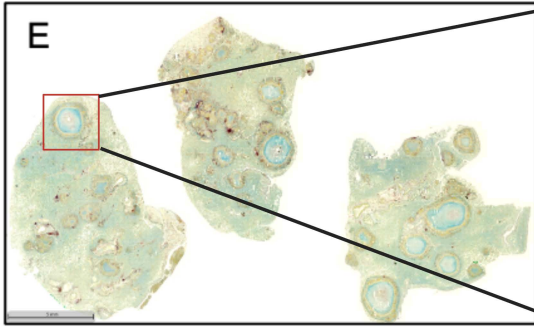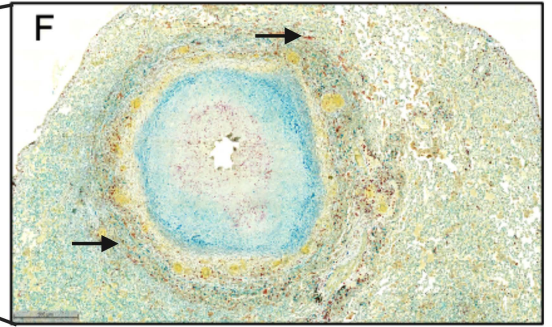

33343

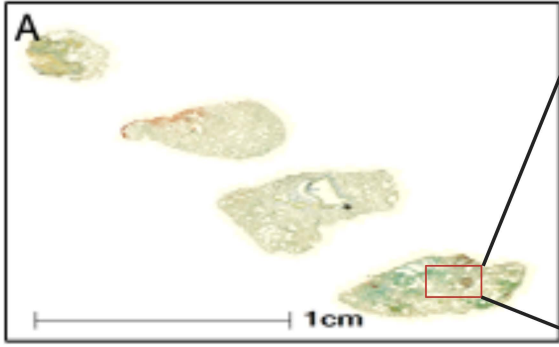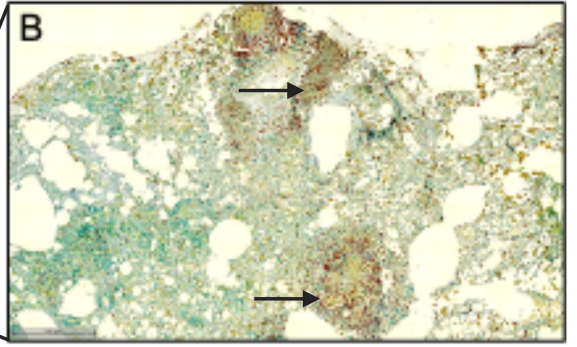

33994

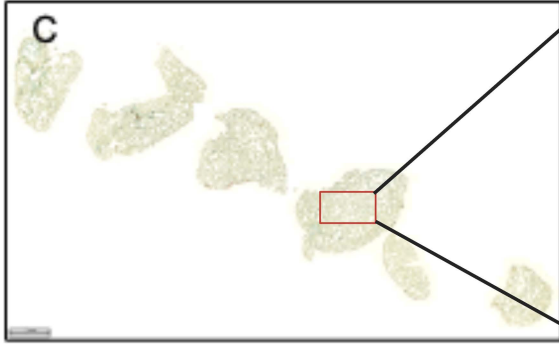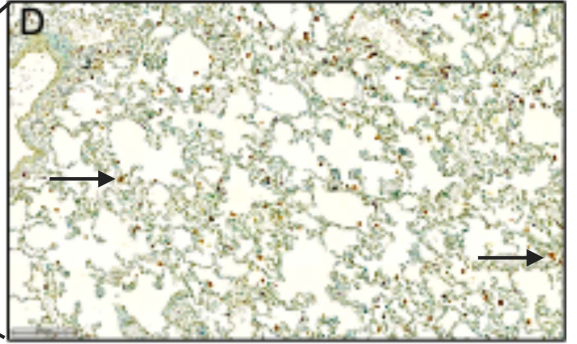

34741

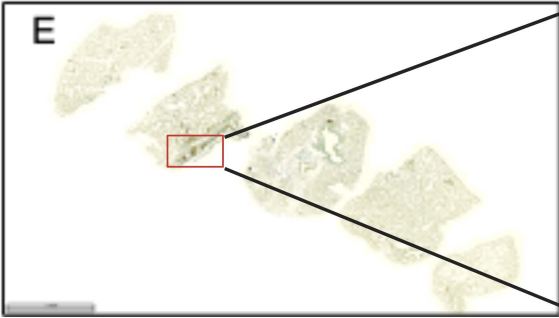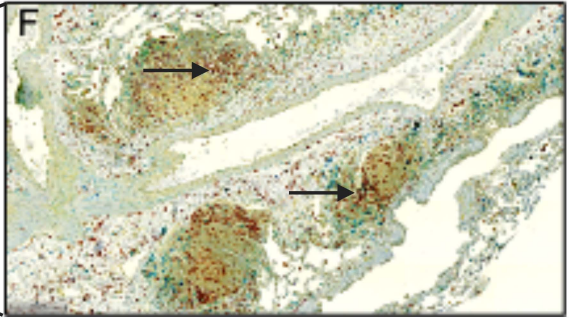

41876

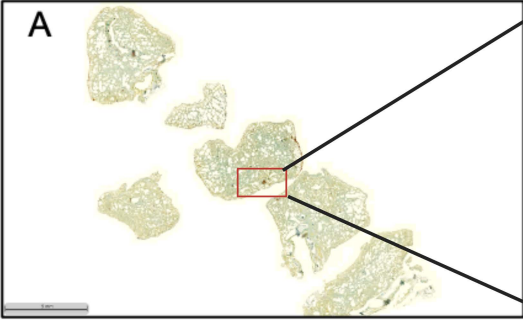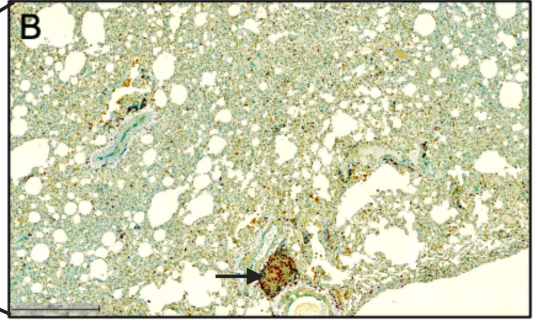

41882

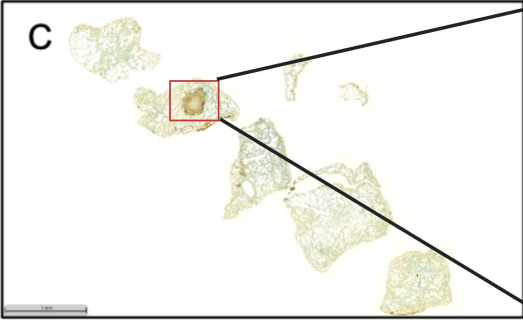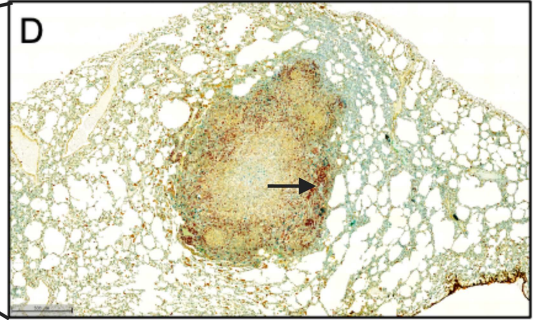

41901

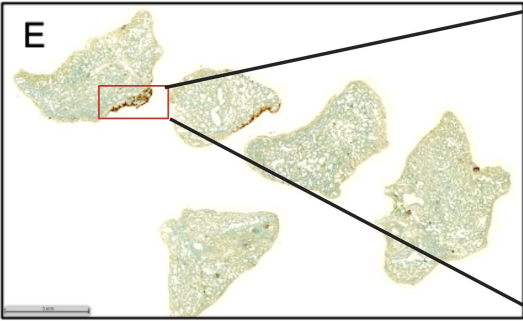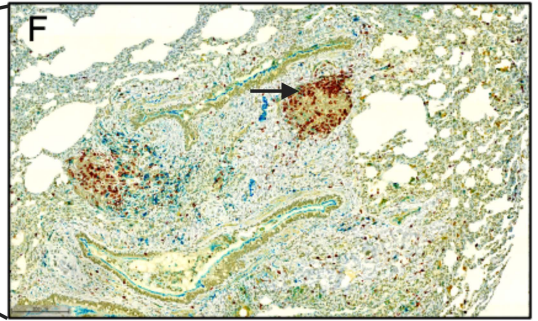



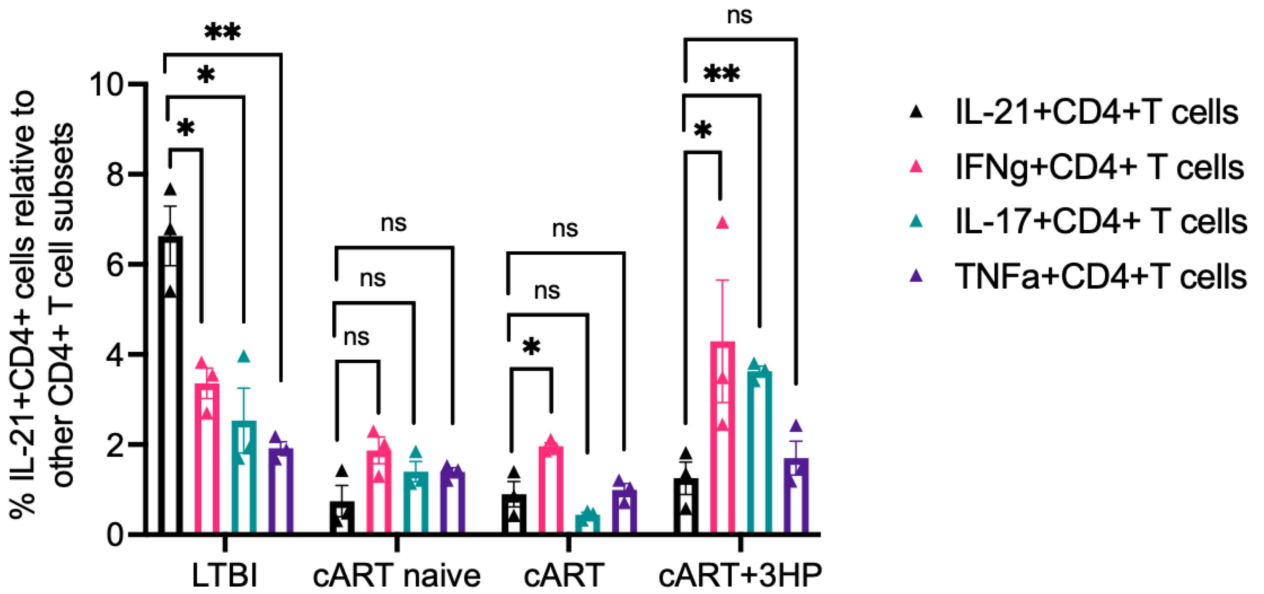

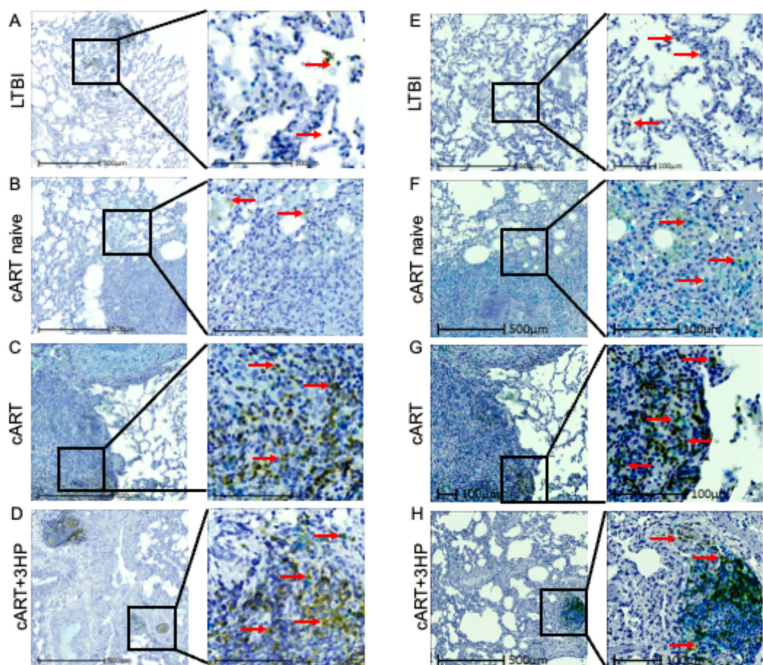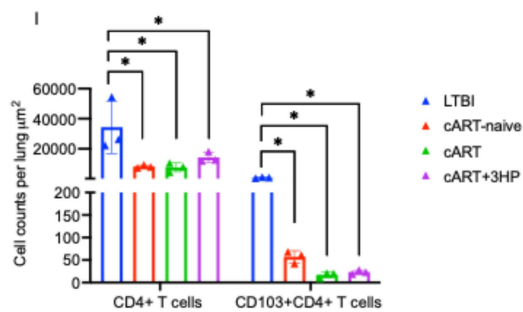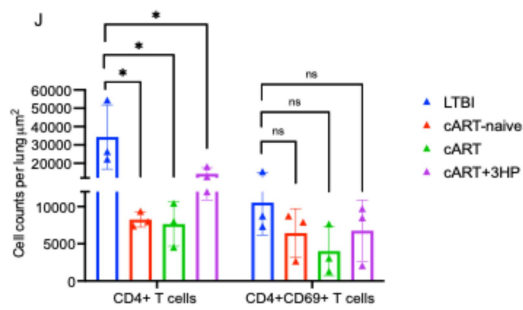

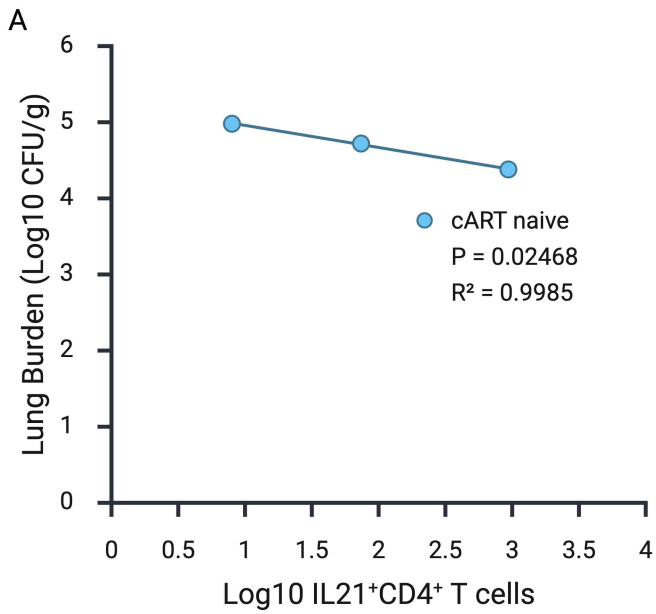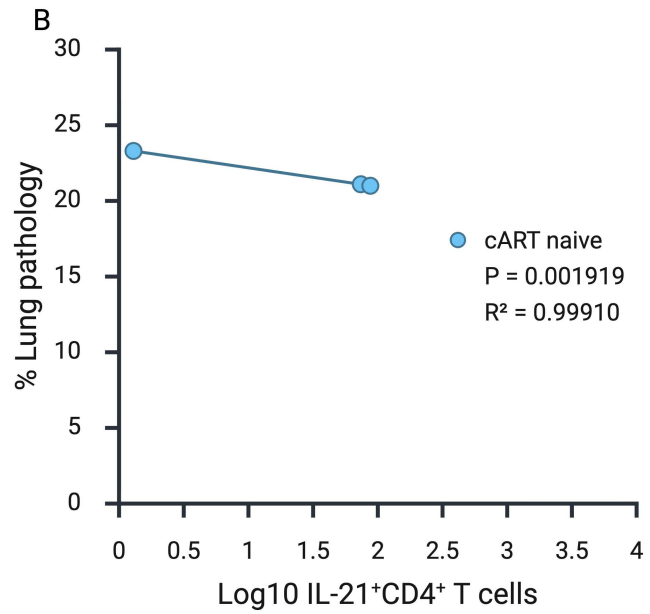

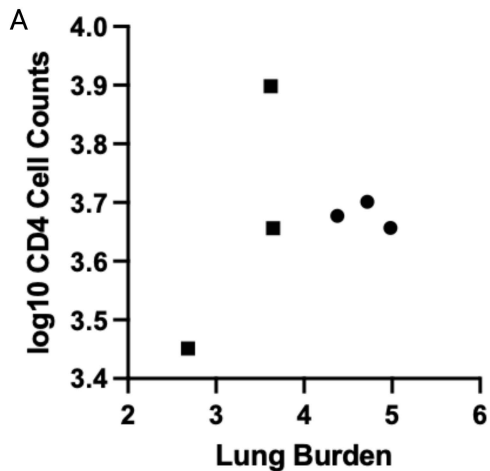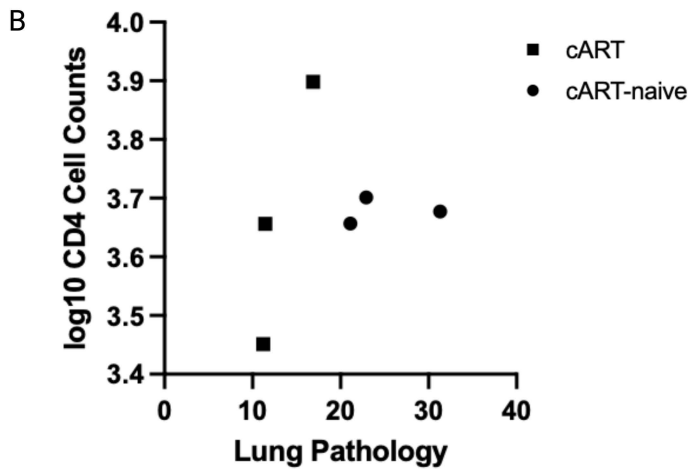

|                             | Lung Burden vs. cART-naive | Lung Burden vs. cART |
|-----------------------------|----------------------------|----------------------|
| Pearson r                   |                            |                      |
| r                           | -0.3906                    | 0.8261               |
| 95% confidence interval     |                            |                      |
| R squared                   | 0.1525                     | 0.6824               |
| P value                     |                            |                      |
| P (one-tailed)              | 0.3723                     | 0.1906               |
| P value summary             | ns                         | ns                   |
| Significant? (alpha = 0.05) | No                         | No                   |

|                             | Lung Pathology vs. cART-naive | Lung Pathology vs. cART |
|-----------------------------|-------------------------------|-------------------------|
| Pearson r                   |                               |                         |
| r                           | 0.1203                        | 0.9048                  |
| 95% confidence interval     |                               |                         |
| R squared                   | 0.01446                       | 0.8187                  |
| P value                     |                               |                         |
| P (one-tailed)              | 0.4616                        | 0.14                    |
| P value summary             | ns                            | ns                      |
| Significant? (alpha = 0.05) | No                            | No                      |

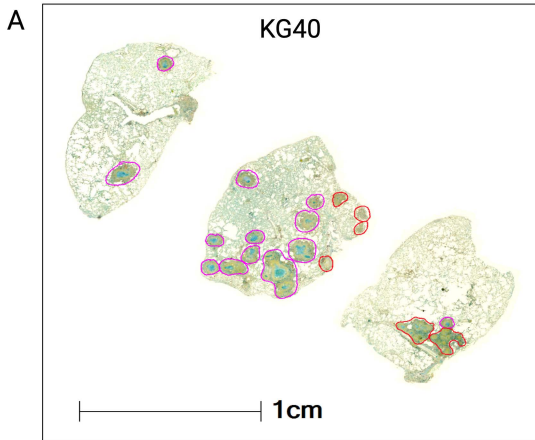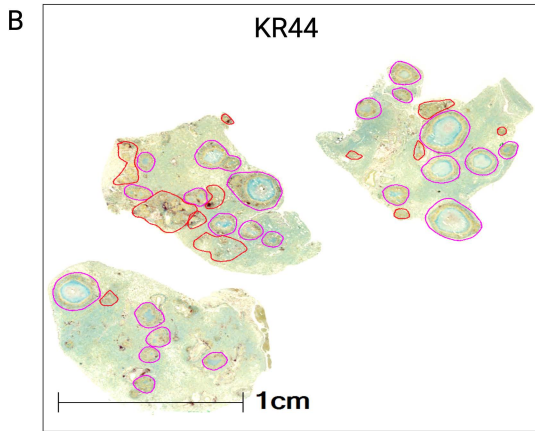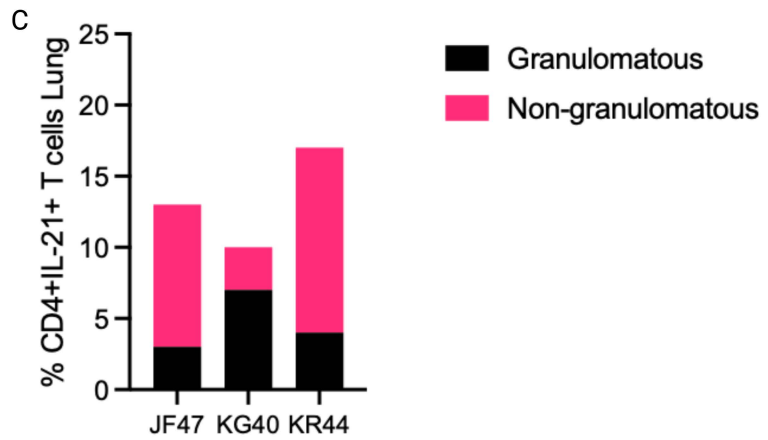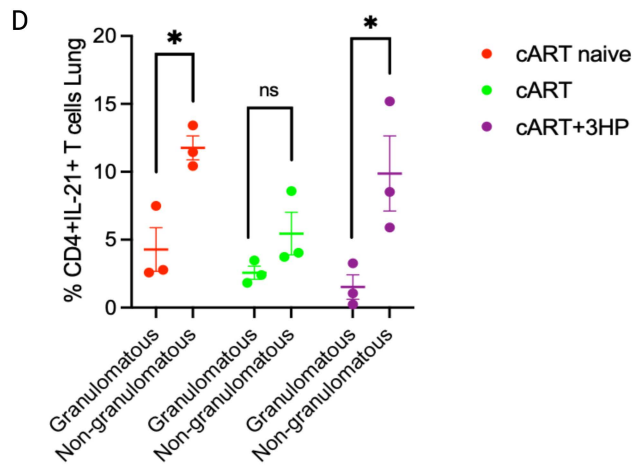

**A Tissue analysis**

Grid tissue section on oligo(dT) primers slide

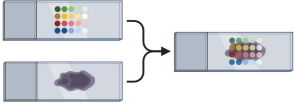

**B cDNA synthesis**

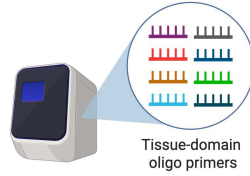

**C Gene expression**

Spatially-resolved genes encoded via oligo tag

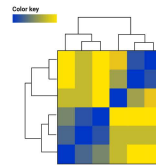

**D Data analysis**

Gene clusters association to tissue domains

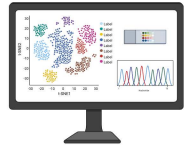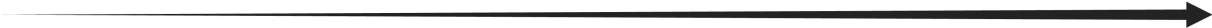

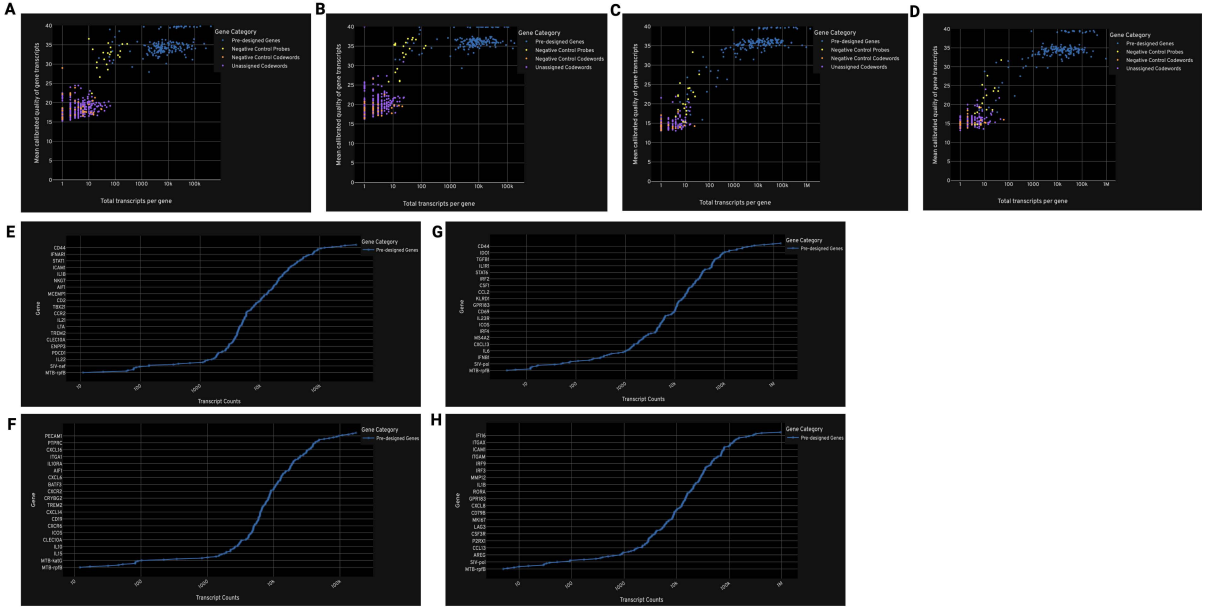

|                                                                                    | <b>LTBI</b>      | <b>cART naïve</b> | <b>cART</b>      | <b>cART+3HP</b>  |
|------------------------------------------------------------------------------------|------------------|-------------------|------------------|------------------|
| <b>No. of cells detected</b>                                                       | <b>347,255</b>   | <b>216,156</b>    | <b>147,895</b>   | <b>118,859</b>   |
| <b>Median transcripts per cell</b>                                                 | <b>8</b>         | <b>9</b>          | <b>24</b>        | <b>35</b>        |
| <b>Median genes per cell</b>                                                       | <b>6</b>         | <b>7</b>          | <b>14</b>        | <b>18</b>        |
| <b>High quality gene transcripts</b>                                               | <b>95.20%</b>    | <b>95.50%</b>     | <b>92.00%</b>    | <b>87.50%</b>    |
| <b>Total high quality decoded transcripts</b>                                      | <b>4,000,617</b> | <b>2,919,184</b>  | <b>8,215,688</b> | <b>7,219,547</b> |
| <b>Nuclear transcripts per 100 <math>\mu\text{m}^2</math></b>                      | <b>25.1</b>      | <b>30.2</b>       | <b>84.5</b>      | <b>113.8</b>     |
| <b>Thickness of high quality decoded transcripts (in <math>\mu\text{m}</math>)</b> | <b>12.741</b>    | <b>10.857</b>     | <b>6.769</b>     | <b>7.513</b>     |
| <b>Cellular transcripts per 100 <math>\mu\text{m}^2</math></b>                     | <b>16</b>        | <b>18.6</b>       | <b>76</b>        | <b>89.6</b>      |

A

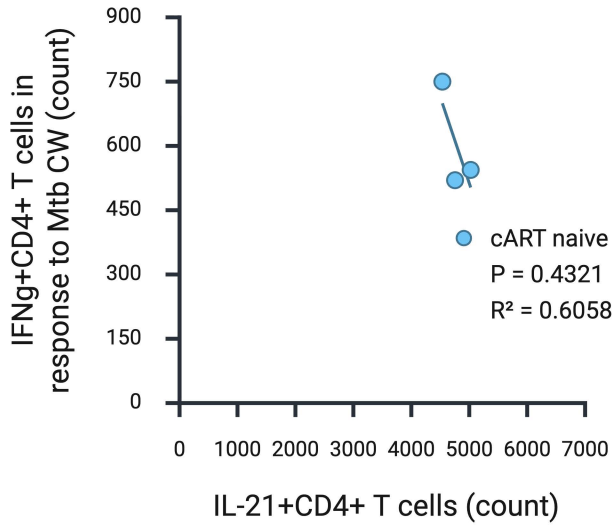

B

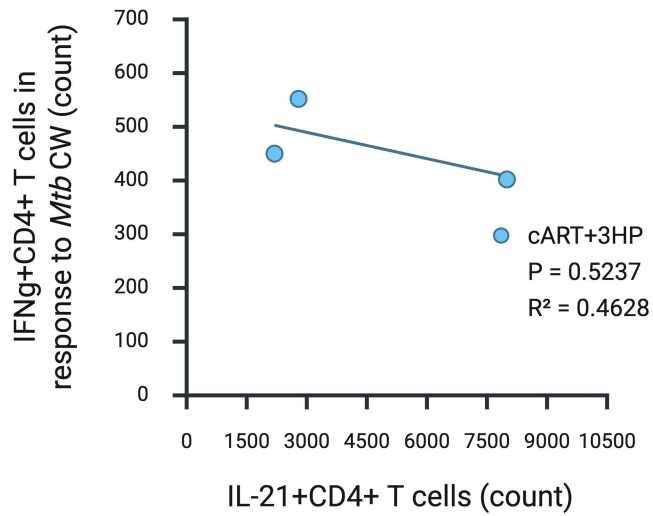

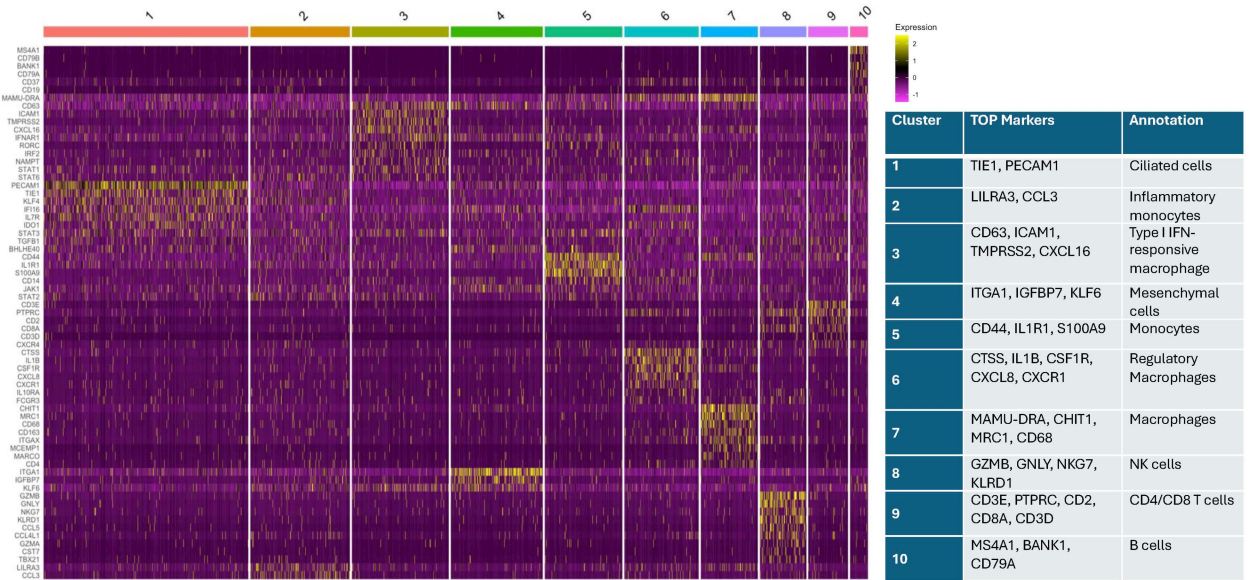

Heatmap of Top Marker Gene Expression by Cluster: LTBI

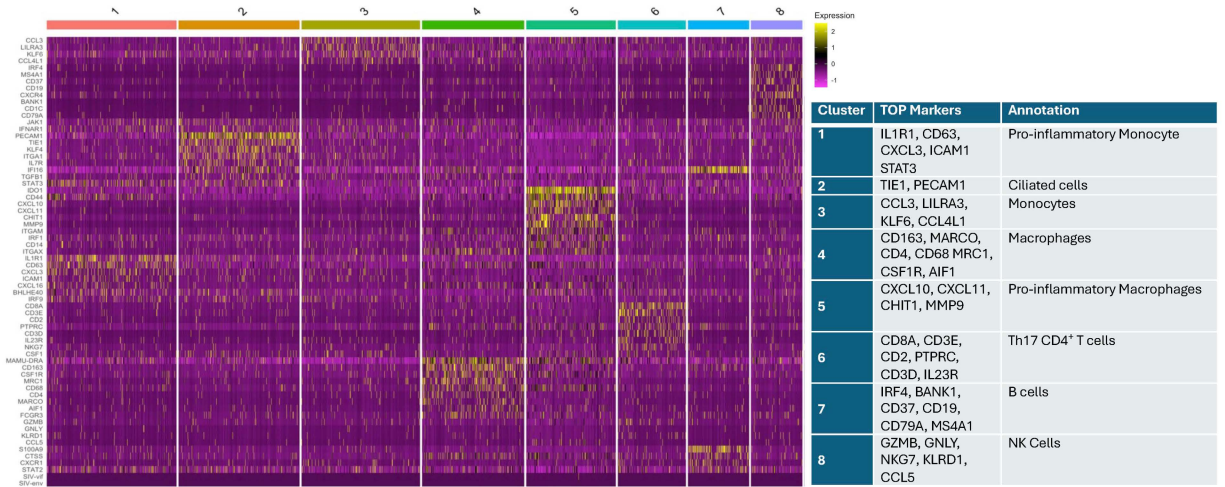

Heatmap of Top Marker Gene Expression by Cluster: cART naive

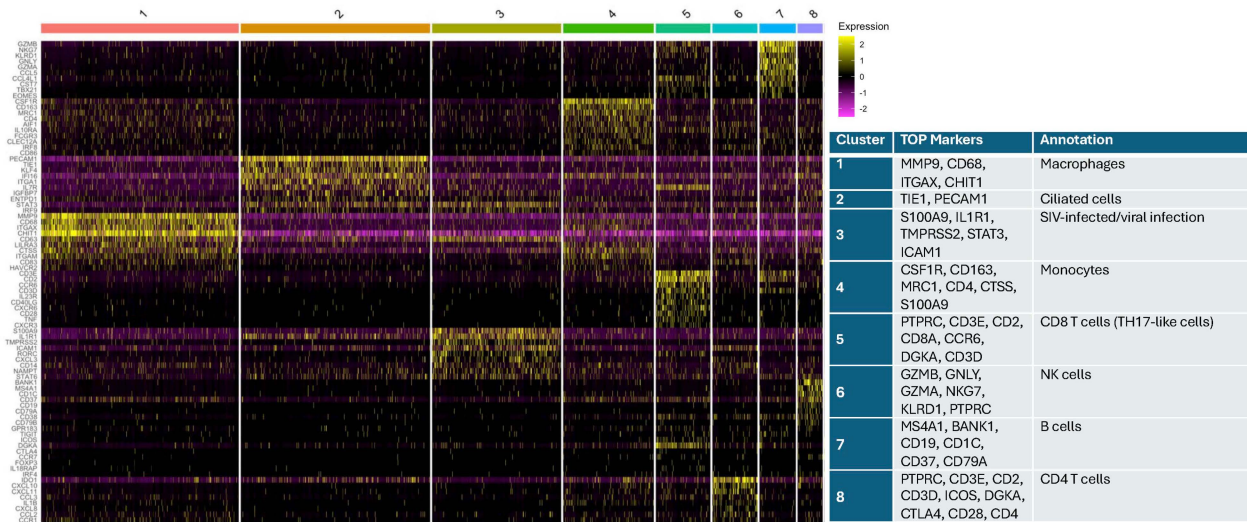

Heatmap of Top Marker Gene Expression by Cluster: cART

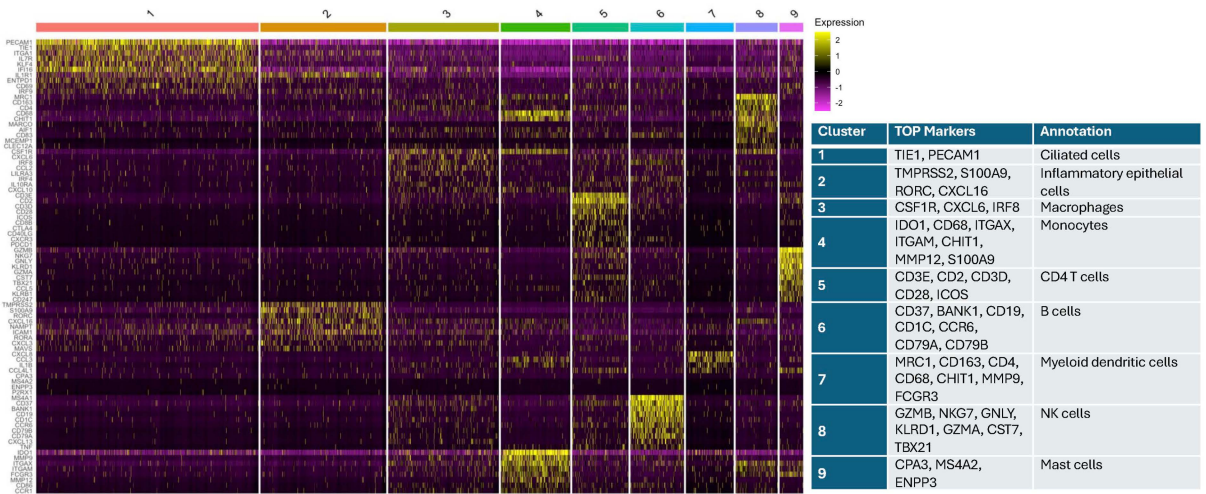

Heatmap of Top Marker Gene Expression by Cluster: cART+3HP

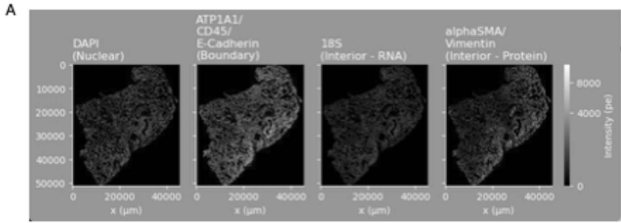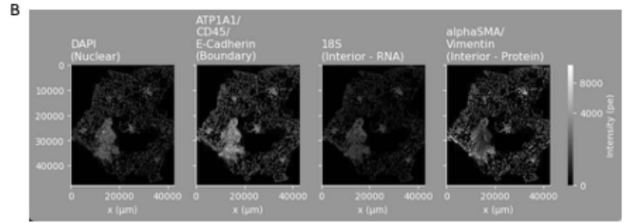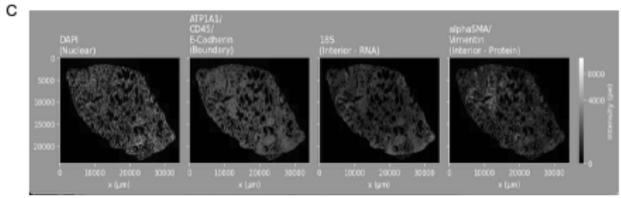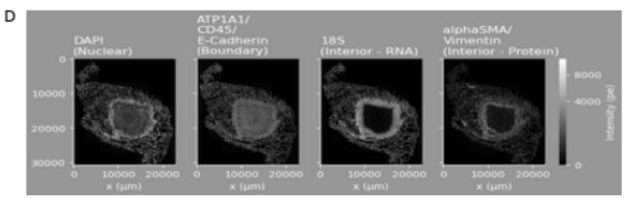

| <b>Sample ID</b> | <b>Group</b>            | <b>Description</b>                    |
|------------------|-------------------------|---------------------------------------|
| HV02             | LTBI                    | Baseline (2 regions)                  |
| KG40             | LTBI + SIV              | Untreated (2 regions)                 |
| 33343            | LTBI + SIV + cART       | cART treated (3 regions)              |
| 41882            | LTBI + SIV + cART + 3HP | cART treated + TB therapy (4 regions) |

| <b>Cell Type</b>        | <b>Reference Markers</b>                                                   |
|-------------------------|----------------------------------------------------------------------------|
| Macrophage              | CD63, MRC1(CD206), CD44, PTPRC(CD45), CD163, CD83, CD14, MND4, FCGR3(CD16) |
| Monocyte                | MRC1(CD206), CD44, PTPRC(CD45), CD83, ITGAX, CSF3R(CD114), NAMPT, S100A9   |
| CD4 T cells             | PTPRC(CD45), CD44, CD3D, CD69, IL23R, CD3E, CD4                            |
| CD8 T cells             | PTPRC(CD45), CD44, CD3D, CD8B, CD69, CD8A, CD3E                            |
| NK cells                | PTPRC(CD45), CD44, NCAM1(CD56), NKG2A                                      |
| B cells                 | PTPRC(CD45), CD44, CD79B, CD69, CD19, CD79A                                |
| Mast cells              | ENPP3(CD203c), CD44, KIT(CD117), CD69, PTPRC(CD45)                         |
| Myeloid dendritic cells | ITGAM(CD11b), PTPRC(CD45), CDC1                                            |
| Ciliated cells          | TIE1 (CD31), PECAM1 (CD31)                                                 |

| Animal ID | Group            | Sex    | Age   | Therapy initiation | MAMU Type   |             |             |
|-----------|------------------|--------|-------|--------------------|-------------|-------------|-------------|
|           |                  |        |       |                    | <i>A*01</i> | <i>B*08</i> | <i>B*17</i> |
| 33343     | cART treated     | Female | 6.30  | 2 wks post-SIV     | Negative    | Negative    | Positive    |
| 33994     | cART treated     | Male   | 7.00  | 2 wks post-SIV     | Negative    | Negative    | Positive    |
| 34741     | cART treated     | Female | 5.30  | 2 wks post-SIV     | Negative    | Negative    | Negative    |
| 35974     | cART treated     | Female | 4.40  | 2 wks post-SIV     | Negative    | Negative    | Positive    |
| 34561     | cART+3HP treated | Female | 7.90  | 2 wks post-SIV     | Negative    | Negative    | Negative    |
| 41898     | cART+3HP treated | Male   | 4.93  | 2 wks post-SIV     | Positive    | Negative    | Negative    |
| 41901     | cART+3HP treated | Male   | 4.88  | 2 wks post-SIV     | Negative    | Negative    | Negative    |
| 41882     | cART+3HP treated | Male   | 4.132 | 2 wks post-SIV     | Negative    | Negative    | Negative    |
| 41876     | cART+3HP treated | Male   | 5.102 | 2 wks post-SIV     | Negative    | Negative    | Negative    |
| 41879     | cART+3HP treated | Male   | 5.61  | 2 wks post-SIV     | Negative    | Negative    | Negative    |
| KR44      | cART naïve       | Male   | 5.50  | No cART            | Positive    | Negative    | Negative    |
| LC88      | cART naïve       | Male   | 4.10  | No cART            | Negative    | Negative    | Negative    |
| JH07      | cART naïve       | Male   | 7.32  | No cART            | Negative    | Negative    | Negative    |
| JF23      | cART naïve       | Male   | 7.26  | No cART            | Positive    | Negative    | Negative    |
| KG40      | cART naïve       | Male   | 5.51  | No cART            | Negative    | Negative    | Negative    |
| IP88      | cART naïve       | Male   | 7.05  | No cART            | Positive    | Negative    | Negative    |
| JI68      | cART naïve       | Male   | 6.06  | No cART            | Negative    | Negative    | Negative    |
| JE48      | cART naïve       | Male   | 6.33  | No cART            | Negative    | Negative    | Negative    |
| GP50      | LTBI             | Male   | 11.18 | No cART            | Positive    | Negative    | Negative    |
| JF47      | LTBI             | Male   | 7.32  | No cART            | Negative    | Negative    | Negative    |
| HV02      | LTBI             | Male   | 9.34  | No cART            | Negative    | Negative    | Negative    |
| JD72      | LTBI             | Male   | 7.38  | No cART            | Negative    | Negative    | Negative    |

| Lung       | Tissue Area ( $\mu\text{m}^2$ ) |
|------------|---------------------------------|
| LTBI       | 233556800                       |
|            | 239154448                       |
|            | 273528896                       |
| cART naïve | 228770464                       |
|            | 166268784                       |
|            | 153978912                       |
| cART       | 170309040                       |
|            | 107882232                       |
|            | 90442016                        |
| cART+3HP   | 153487856                       |
|            | 139960048                       |
|            | 205737744                       |
